# Supplementary material for: Anomalous molecular infiltration in graphene laminates
Source: Royal Society of Chemistry journal article supplement (doi:10.1039/c8cp03879a), 2018-01-01
Supplement: c8cp03879a1.pdf [file c8cp03879a1.pdf]

## Anomalous Molecular Infiltration in Graphene Laminated

Riccardo Checchetto,<sup>a</sup> Paolo Bettotti,<sup>a</sup> Roberto Sennen Brusa,<sup>a,b</sup> Gianfranco Carotenuto,<sup>c</sup> Werner Egger,<sup>d</sup> Christoph Hugenschmidt<sup>e</sup> and Antonio Miotello<sup>a</sup>

<sup>a</sup> Department of Physics, University of Trento, Via Sommarive 14, I-38123 Povo-Trento, Italy

<sup>b</sup> INFN-TIFPA, Via Sommarive 14, I-38123 Povo-Trento, Italy

<sup>c</sup> Institute for Polymers, Composites and Biomaterials, National Research Council, Piazzale E. Fermi, 1—80055 Portici (NA), Italy

<sup>d</sup> Universität der Bundeswehr (München) und Institut für Angewandte Physik und Messtechnik, LTR 2 Werner Heisenberg Weg 39, 85577 Neubiberg, Germany

<sup>e</sup> FRM II and Physik Department E21, Technische Universität München, 85747 Garching, Germany

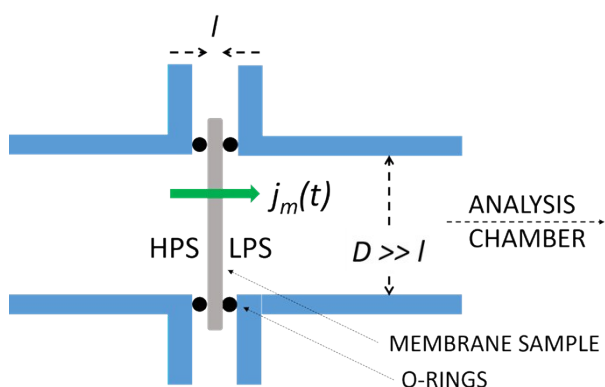

**Fig. SM1** : Schematic picture of the sample holder. Vacuum sealing of the membrane sample is ensured by O-rings.  $j_m(t)$  : permeation flux,  $D$  : membrane diameter,  $l$  : membrane thickness. In the presents sample set-up,  $D \gg l$  and the penetrant transport process can be described in a 1-imensional geometry as edge effects can be neglected, see ref. 13 in the manuscript.

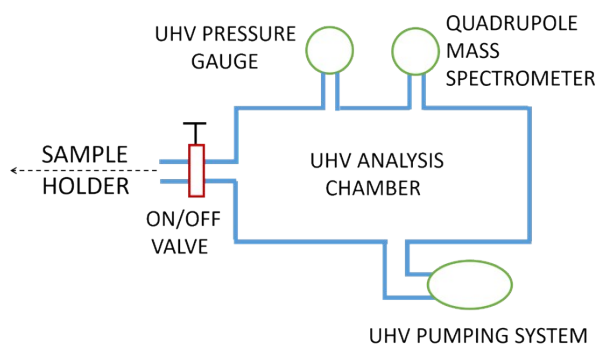

**Fig. SM2** : Schematic picture of the experimental apparatus. Only the most important components are shown. In the permeation process, the permeation flux through the membrane sample,  $j_m(t)$ , gives rise to the increase of the penetrant partial pressure  $p_{LPS}(t)$  which is measured, as a function of time, by the calibrated QMS. The transport process is monitored under continuous pumping conditions of the analysis chamber.

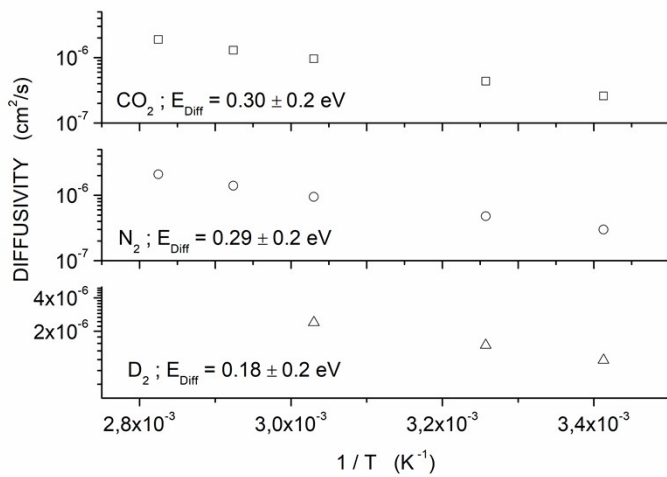

**Fig. SM3** : CO<sub>2</sub> , N<sub>2</sub> and <sup>2</sup>H<sub>2</sub> diffusivity values in the Low Density Polyethylene support. In the inset we report the activation energy values for penetrant diffusion.

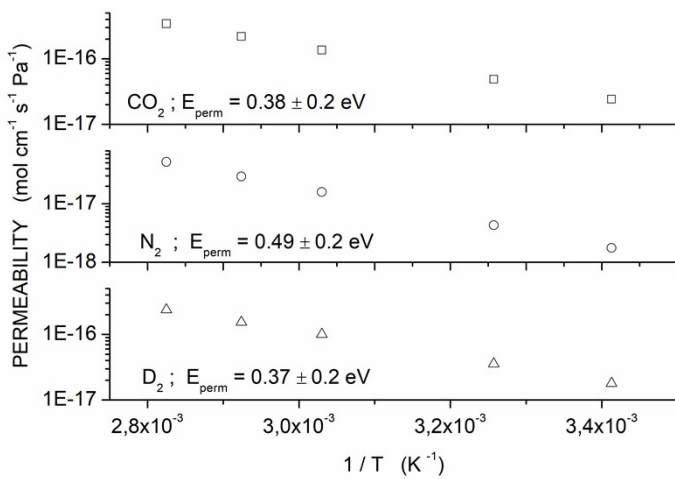

**Fig. SM4** : CO<sub>2</sub> , N<sub>2</sub> and <sup>2</sup>H<sub>2</sub> permeability values in the Low Density Polyethylene support. In the inset we report the activation energy values for penetrant permeation.
